# Supplementary material for: Whole-genome analysis of Mustela erminea finds that pulsed hybridization impacts evolution at high latitudes
Source: PubMed Central journal article supplement (PMC6123727; doi:10.1038/s42003-018-0058-y), 2018-05-31
Supplement: 42003_2018_58_MOESM1_ESM.pdf [file 42003_2018_58_MOESM1_ESM.pdf]

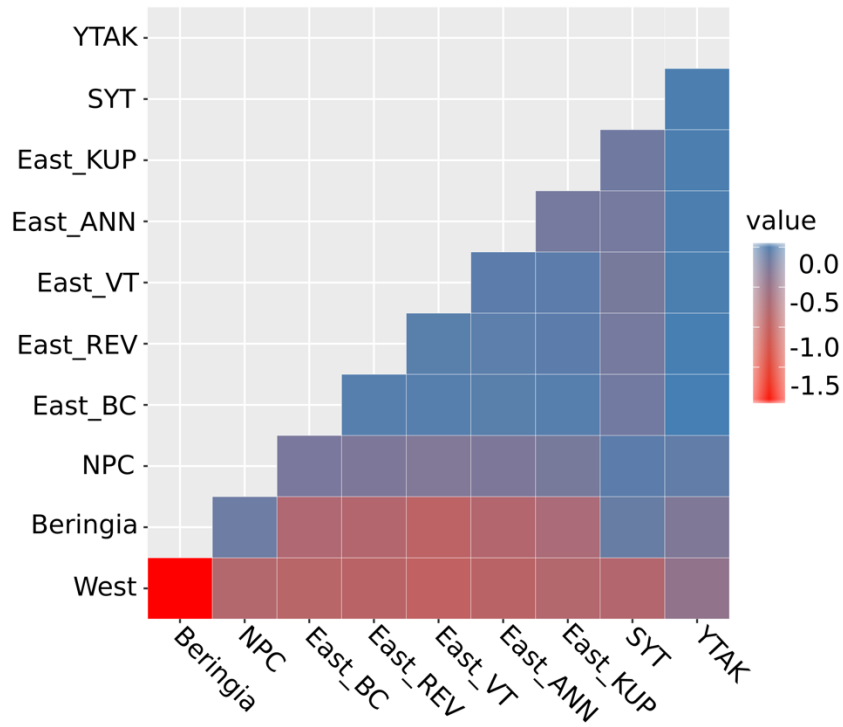

9

10 **Supplementary Figure 2.** Pairwise relatedness2 indices (proxy for  $F_{ST}^2$ ) across all stoat samples  
 11 with red indicating greater differentiation and blue, greater similarity between samples. These  
 12 data first demonstrate substantial divergence of the West clade from all other stoats, especially  
 13 from Beringia. Second, Beringia demonstrates greatest genetic similarity to its geographically  
 14 isolated sister: the NPC clade. Lastly, both island and mainland hybrids are highly similar,  
 15 supporting their origination from the same source populations despite temporal and geographic  
 16 separation.

17

18

19

20

21

22

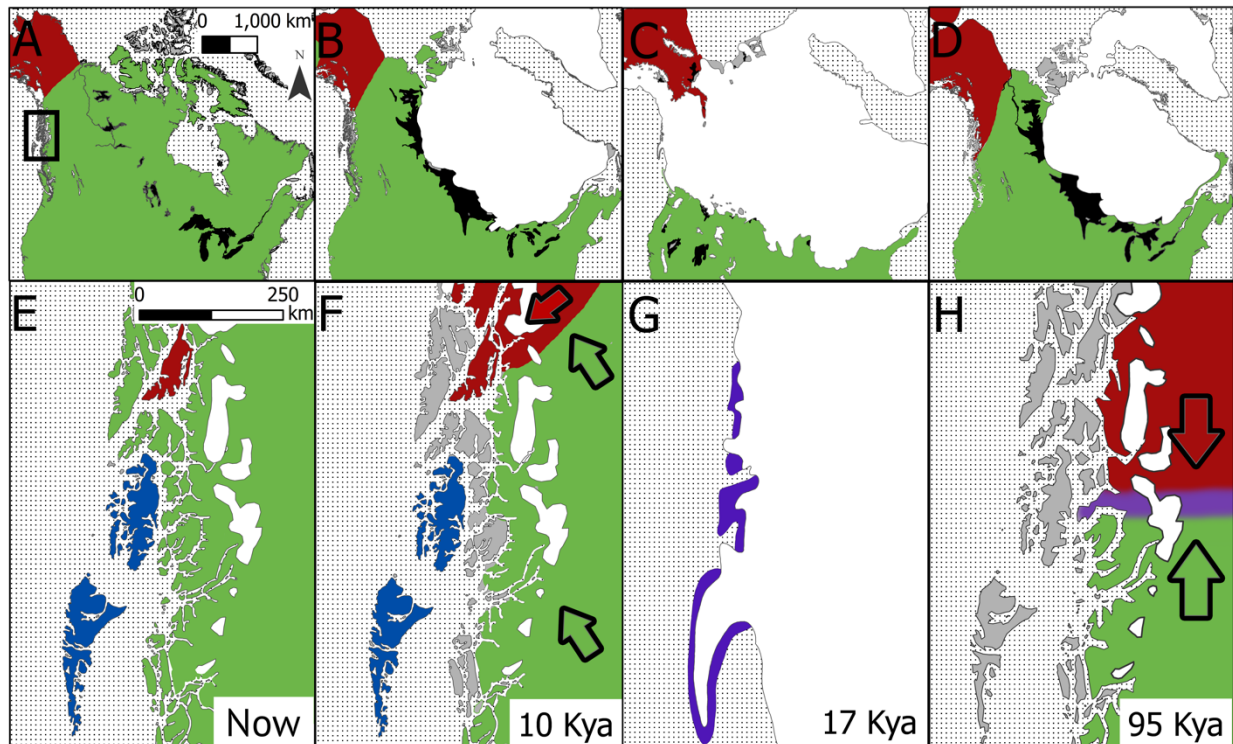

23

24

25

26

27

28

29

30

31

32

33

34

35

**Supplementary Figure 3.** Hypothesized climatically-driven isolation and secondary contact between stoat lineages. Eight, vertically paired panels with the greater extent North America in top panels (A-D) and lesser extent, North Pacific Coast (NPC) below (E-H; extent indicator included in panel A only) that reflect glaciation at four distinct time periods: Present (A, E), 10 Kya (B, F), 17 Kya (C, G), and 95 Kya (D, H; this period reflects similar glacial patterning to 10 Kya)<sup>3</sup>. Glacial ice is shown in white, lakes in black, and oceans with dotted shading. (A) Contemporary clade distributions and contact between East (green) and Beringia (red) lineages along the Alaska-Yukon Territory border; (B) Beringia-East contact zone historically extended farther south, enabling Beringian colonization of Admiralty Island along the NPC; (C) Refugial isolation during the last glacial period that maintained Beringia-East divergence; (D) Hypothesized ancient mainland hybridization event between Beringia and East lineages. Panels A-D demonstrate climatically-driven secondary contact and isolation between lineages isolated

36 in Beringia (Northwest) and East (eastern continental North America) refugia. Panels E-F  
37 demonstrate an alternative outcome of hybridization played out along North America's NPC,  
38 where a hybrid population (H) was isolated in a glacial refugium (G) and remained isolated as  
39 deglaciation and rising sea levels trapped the hybrid population on islands (F), resulting in  
40 further divergence and potentially speciation (E).

41

42

43

44

45

46

47

48

49

50

51

52

53

54

55

56

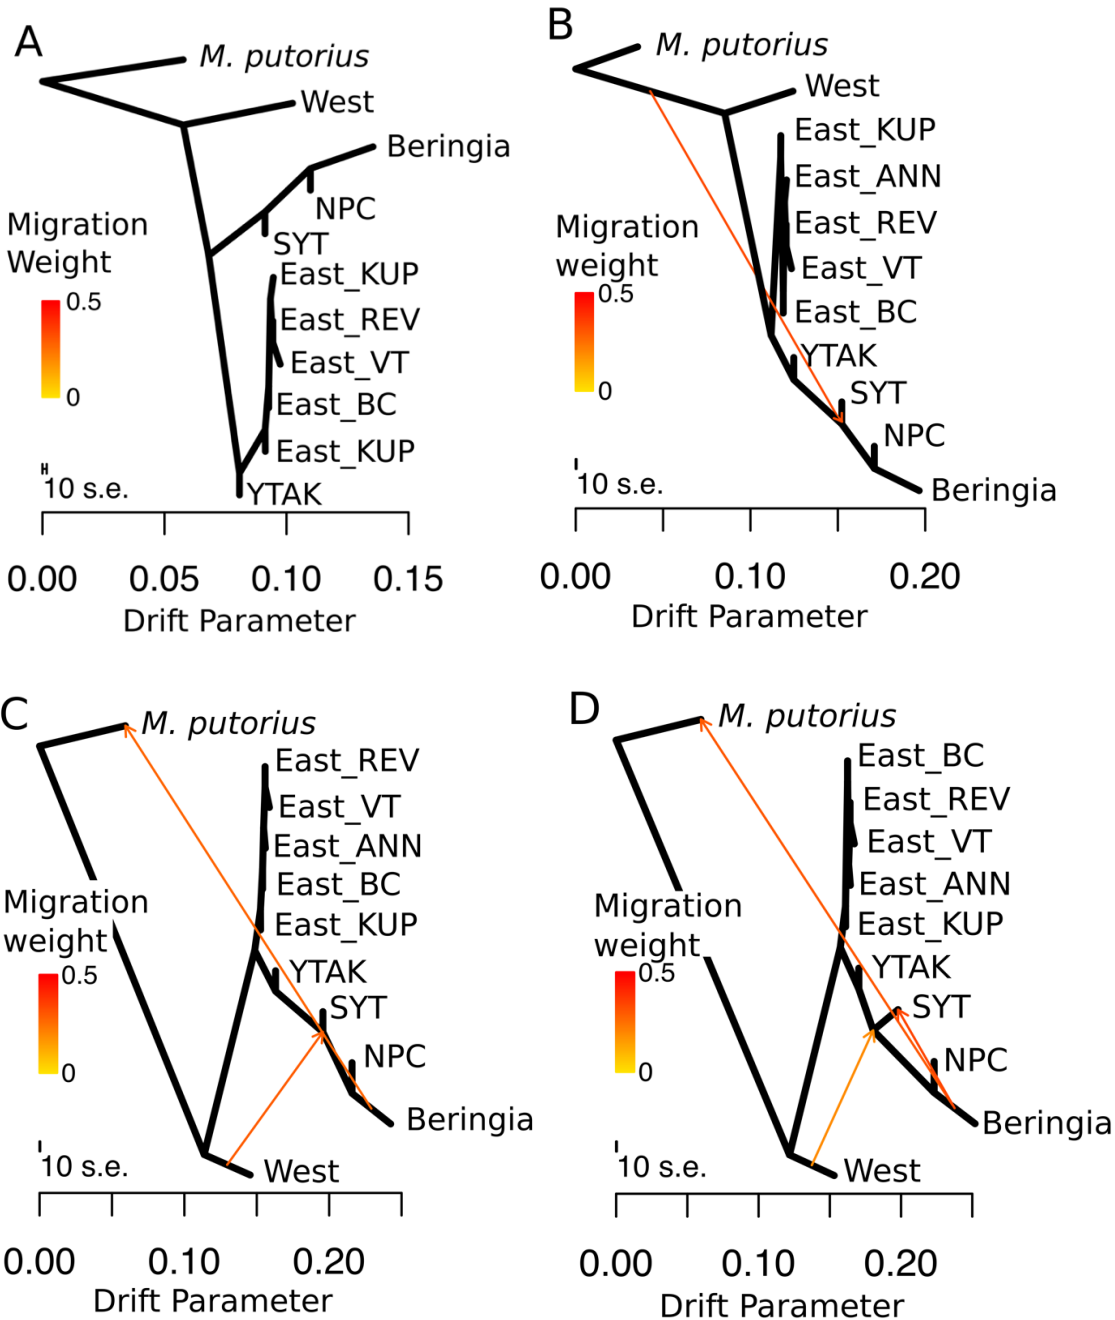

57

58

59 **Supplementary Figure 4.** TreeMix results for 0-3 migration events with *M. putorius* as an  
 60 outgroup. (A) The TreeMix phylogeny without migration is consistent with our RAxML results  
 61 (Fig. 1d); (B) The most likely migration event is between Beringia stoats and an unsampled  
 62 ancestor of all *M. erminea*, consistent with New World colonization from Beringia and  
 63 subsequent diversification in North America. Further, adding a migration event pulls both

64 contemporary hybrids (SYT, YTAK) towards their Beringia ancestor; (C) The second most  
65 supported migration event links West and SYT, supporting the hybrid ancestry of this individual;  
66 (D) and the third migration event links Beringia and SYT, highlighting the biased introgression  
67 (f4) between these samples.

68

69

70

71

72

73

74

75

76

77

78

79

80

81

82

83

84

85

86

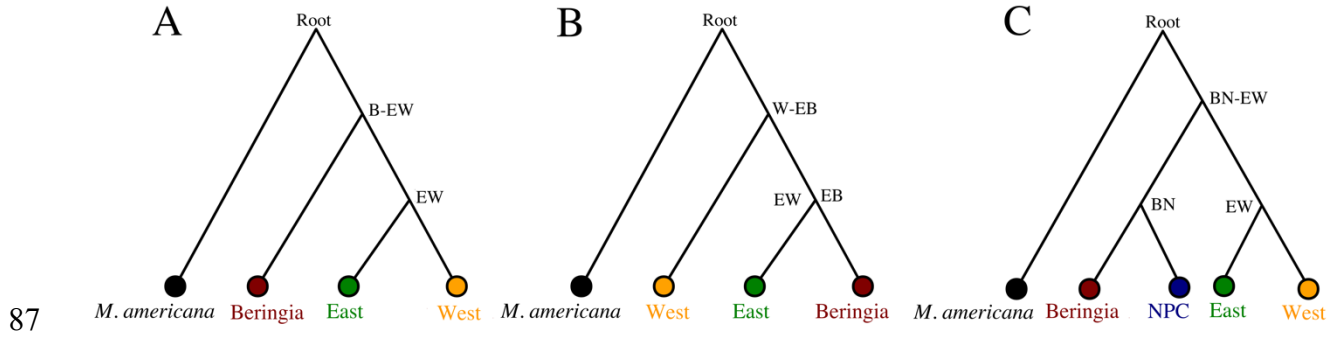

88 **Supplementary Figure 5.** Backbone topologies used to fit hybrid samples in AdmixtureGraph.

89 (A) Represents the maximum-likelihood 4-taxa topology (e.g., RAxML, Fig. 1d); (B) the optimal  
 90 (minimal error) 4-taxa backbone identified by AdmixtureGraph (Supplementary Table 12).

91 When NPC is removed (from AdmixtureGraph and RAxML) West is consistently pulled towards  
 92 the Root; and (C) the optimal 5-taxa backbone delimited in AdmixtureGraph, consistent with our  
 93 RAxML results. Four and 5-taxon backbone phylogenies exclude and include NPC as a ‘pure’  
 94 population, respectively, to enable fitting of all three hybrid samples (A, B) or mainland samples  
 95 only (C).

96

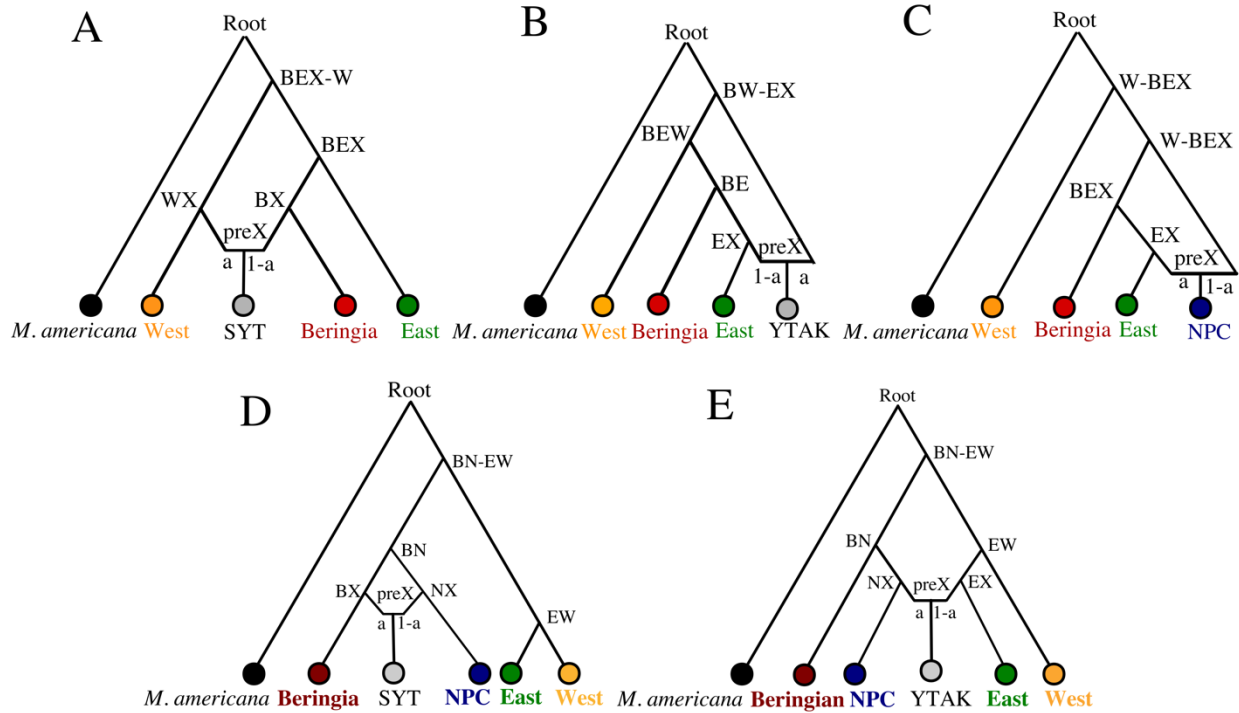

97

98 **Supplementary Figure 6.** Admixture graph fitting of each hybrid sample onto the lowest  
 99 minimal error topology (Supplementary Table 7) 4- or 5-taxa non-admixed topology. Note that  
 100 when NPC is removed from the backbone topology, AdmixtureGraph optimization pulls the  
 101 West clade towards the root, however, in a 5-taxa backbone, relationships match our RAxML  
 102 (Fig. 1d) and species trees (Supplementary Fig. 1). (A) Under this 4-taxa model, SYT is admixed  
 103 between West and Beringia lineages; (B) YTA is admixed between East and an ancestor of all  
 104 *M. erminea*, consistent with the simulations based on the RAxML topology; and (C) NPC is  
 105 admixed between East and a Beringia-East ancestor. Under a 5-taxa backbone phylogeny,  
 106 including NPC as a ‘pure’ population: (D) shows SYT as the result of NPC-Beringia admixture.  
 107 Since we know the NPC island clade is geographically separated from all others, this likely  
 108 demonstrates the similarity between the two hybrid samples and biased introgression from  
 109 Beringia; and (E) shows YTA as the result of NPC-East admixture, again supporting biased  
 110 introgression from East into YTA and the shared hybrid history of YTA and NPC.



**F4(OutGroup, Ber.; Y, Z)**

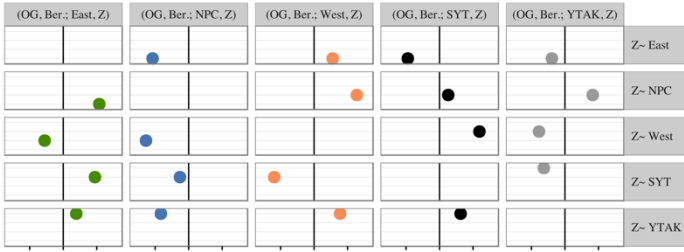

**F4(OutGroup, East; Y, Z)**

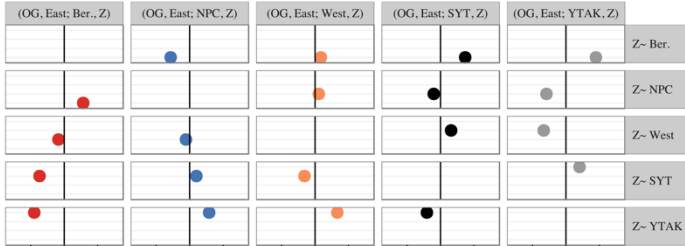

**F4(OutGroup, West; Y, Z)**

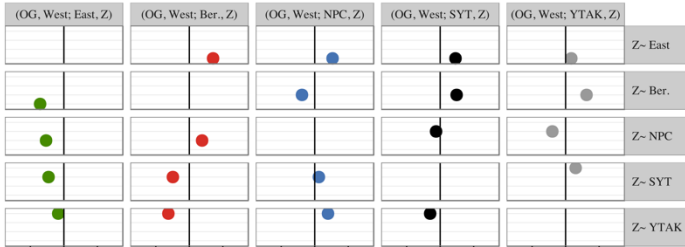

**F4(OutGroup, NPC; Y, Z)**

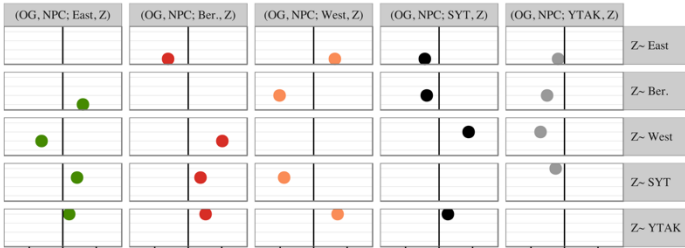

**F4(OutGroup, SYT; Y, Z)**

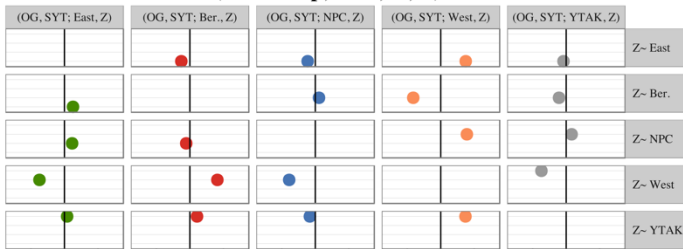

**F4(OutGroup, YTAk; Y, Z)**

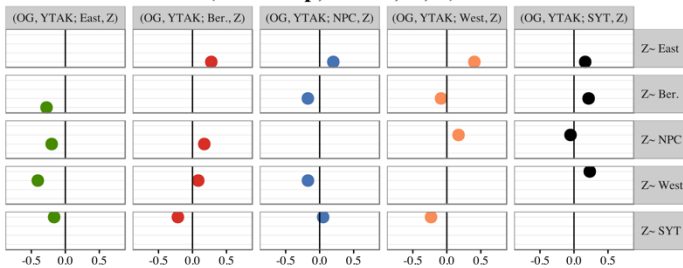

112 **Supplementary Figure 7.**  $f_4$ -statistics [ $f_4(\text{Outgroup}, X; Y, Z)$ ] results for each X population  
113 where Y (horizontal axis) and Z (vertical axis) represent all possible combinations of other  
114 populations, with *M. americana* as an outgroup. A significantly negative  $f_4$ -statistic (e.g., point  
115 left of center in each column) indicates that there is biased allelic overlap between populations X  
116 and Y, whereas significantly positive indicates more shared alleles between X and Z. Non-  
117 significance (e.g., point on the center line) indicates Y and Z share more alleles with each other  
118 than with X. Error bars 5 times the standard error (mostly invisible outside the width of the  
119 points) highlight the extreme significance of these results, underlining the substantial inter-clade  
120 divergence within *M. erminea*. Columns are colored to reflect the Y population being compared.  
121 X assignment by plot: (A) Beringia, (B) East, (C) NPC, (D) West, (E) SYT, (F) YTAK.

122

123

124

125

126

127

128

129

130

131

132

133

134

135 **Supplementary Table 1. Pairwise percent difference**

| <b>Clade</b> |              | East      | NPC        | East       | East      | Hybrid     | East       | East       | West      | Hybrid      | Ber. <sup>b</sup> | OG <sup>c</sup> |
|--------------|--------------|-----------|------------|------------|-----------|------------|------------|------------|-----------|-------------|-------------------|-----------------|
|              | <b>Coll.</b> |           |            |            |           |            |            |            |           |             |                   |                 |
|              | <b>Loc.</b>  | <b>BC</b> | <b>POW</b> | <b>REV</b> | <b>VT</b> | <b>SYT</b> | <b>ANN</b> | <b>KUP</b> | <b>NM</b> | <b>YTAK</b> | <b>MON</b>        | <b>OG</b>       |
| East         | <b>BC</b>    |           | 4.14       | 1.19       | 1.29      | 1.25       | 1.31       | 1.57       | 1.83      | 1.40        | 4.11              | 9.01            |
| NPC          | <b>POW</b>   | 19.70     |            | 4.17       | 4.19      | 4.09       | 3.99       | 4.43       | 4.20      | 4.16        | 2.71              | 8.51            |
| East         | <b>REV</b>   | 14.06     | 19.74      |            | 1.29      | 1.25       | 1.32       | 1.57       | 1.81      | 1.40        | 4.15              | 9.01            |
| East         | <b>VT</b>    | 13.62     | 19.97      | 13.57      |           | 1.23       | 1.26       | 1.51       | 1.79      | 1.36        | 4.15              | 9.10            |
| Hybrid       | <b>SYT</b>   | 17.97     | 15.96      | 17.96      | 18.00     |            | 1.19       | 1.40       | 1.78      | 1.26        | 4.08              | 8.86            |
| East         | <b>ANN</b>   | 14.15     | 19.71      | 14.00      | 13.70     | 17.97      |            | 1.54       | 1.82      | 1.16        | 4.15              | 8.72            |
| East         | <b>KUP</b>   | 14.38     | 19.71      | 14.55      | 14.10     | 18.17      | 14.63      |            | 2.03      | 1.53        | 4.36              | 9.32            |
| West         | <b>NM</b>    | 16.65     | 19.50      | 16.52      | 16.70     | 18.36      | 16.64      | 16.86      |           | 1.92        | 4.14              | 9.12            |
| Hybrid       | <b>YTAK</b>  | 16.06     | 18.86      | 16.00      | 15.65     | 17.66      | 16.12      | 16.42      | 17.77     |             | 4.23              | 8.93            |
| Ber.         | <b>MON</b>   | 20.60     | 12.57      | 20.63      | 21.13     | 13.39      | 20.59      | 20.65      | 19.13     | 18.75       |                   | 9.22            |
| OG           | <b>OG</b>    | 22.46     | 22.31      | 22.42      | 22.35     | 21.61      | 22.48      | 22.70      | 18.48     | 22.79       | 20.30             |                 |

136 <sup>a</sup> lower triangle: percent pairwise difference between >3 million autosomal SNPs; upper triangle:  
 137 percent pairwise difference between mitochondrial genomes. Darker shades of grey indicate  
 138 greater pairwise divergence.

139 <sup>b</sup> Ber. = Beringia

140 <sup>c</sup> OG = outgroup (*Mustela putorius*)

141  
 142  
 143  
 144  
 145  
 146  
 147  
 148  
 149  
 150  
 151  
 152  
 153  
 154  
 155  
 156  
 157  
 158  
 159  
 160  
 161  
 162  
 163

164 **Supplementary Table 2. Wright's  $F_{ST}$**

| <b>Populations</b> | <b>Avg. # Variants</b> | <b>Weighted <math>F_{ST}</math></b> | <b>Mean <math>F_{ST}</math></b> |
|--------------------|------------------------|-------------------------------------|---------------------------------|
| East v. NPC        | 251.01                 | 0.33                                | 0.17                            |
| East v. West       | 534.60                 | 0.35                                | 0.13                            |
| East v. Beringia   | 542.18                 | 0.37                                | 0.18                            |

165 <sup>a</sup> Values based on 100bp sliding window

166 <sup>b</sup> Mean  $F_{ST}$  values >0.1 are considered moderate to high. Weighted  $F_{ST}$  values > 0.25 indicate  
 167 substantial divergence between clades.

168  
 169  
 170  
 171  
 172  
 173  
 174  
 175  
 176  
 177  
 178  
 179  
 180  
 181  
 182  
 183  
 184  
 185  
 186  
 187  
 188  
 189  
 190  
 191  
 192  
 193  
 194  
 195  
 196  
 197  
 198  
 199  
 200  
 201  
 202  
 203  
 204  
 205

206 **Supplementary Table 3. AdmixTools  $f_3$ -statistics**  
 207

| Target      | Source 1    | Source 2        | $f_3$          | Standard Err  | Z-score         | SNPs           |
|-------------|-------------|-----------------|----------------|---------------|-----------------|----------------|
| <i>NPC</i>  | <i>East</i> | <i>Beringia</i> | <b>-0.0496</b> | <b>0.0094</b> | <b>-5.277*</b>  | <b>1160372</b> |
| <i>SYT</i>  | <i>East</i> | <i>Beringia</i> | <b>-0.1673</b> | <b>0.0034</b> | <b>-48.662*</b> | <b>2588407</b> |
| SYT         | YTAK        | Beringia        | -0.1198        | 0.0045        | -26.616         | 1752087        |
| SYT         | Beringia    | West            | -0.1096        | 0.0040        | -27.343         | 2031423        |
| SYT         | NPC         | East            | -0.0733        | 0.0065        | -11.360         | 1504688        |
| SYT         | NPC         | YTAK            | -0.0548        | 0.0061        | -8.925          | 999537         |
| SYT         | West        | NPC             | -0.0534        | 0.0056        | -9.459          | 1101322        |
| <i>YTAK</i> | <i>East</i> | <i>Beringia</i> | <b>-0.1451</b> | <b>0.0031</b> | <b>-47.408*</b> | <b>2545866</b> |
| YTAK        | East        | NPC             | -0.1268        | 0.0026        | -48.259         | 1311542        |
| YTAK        | SYT         | East            | -0.1096        | 0.0025        | -43.499         | 2841843        |
| YTAK        | West        | East            | -0.0748        | 0.0024        | -30.933         | 2664291        |
| YTAK        | West        | SYT             | -0.0744        | 0.0032        | -23.342         | 2124843        |
| YTAK        | NPC         | West            | -0.0723        | 0.0036        | -20.119         | 999138         |
| YTAK        | West        | Beringia        | -0.0640        | 0.0043        | -15.032         | 1991741        |

208 \*Significant Z-score (>5)  
 209  
 210  
 211  
 212  
 213  
 214  
 215  
 216  
 217  
 218  
 219  
 220  
 221  
 222  
 223  
 224  
 225  
 226  
 227  
 228  
 229  
 230  
 231  
 232  
 233  
 234

235 **Supplementary Table 4.  $f_2$ -statistics population divergence**  
 236

|                 | <b>East</b> | <b>NPC</b> | <b>SYT</b> | <b>West</b> | <b>YTAK</b> | <b>Beringia</b> |
|-----------------|-------------|------------|------------|-------------|-------------|-----------------|
| <b>East</b>     | 0.0000      | 0.0650     | 0.0284     | 0.0748      | -0.0088     | 0.1015          |
| <b>NPC</b>      | 0.0650      | 0.0000     | 0.0129     | 0.1100      | 0.0267      | 0.0230          |
| <b>SYT</b>      | 0.0284      | 0.0129     | 0.0000     | 0.0798      | -0.0041     | 0.0151          |
| <b>West</b>     | 0.0748      | 0.1100     | 0.0798     | 0.0000      | 0.0569      | 0.1334          |
| <b>YTAK</b>     | -0.0088     | 0.0267     | -0.0041    | 0.0569      | 0.0000      | 0.0529          |
| <b>Beringia</b> | 0.1015      | 0.0230     | 0.0151     | 0.1334      | 0.0529      | 0.0000          |

237  
 238  
 239  
 240  
 241  
 242  
 243  
 244  
 245  
 246  
 247  
 248  
 249  
 250  
 251  
 252  
 253  
 254  
 255  
 256  
 257  
 258  
 259  
 260  
 261  
 262  
 263  
 264  
 265  
 266  
 267  
 268  
 269  
 270  
 271  
 272

273 **Supplementary Table 5. *f4*-statistics within *M. erminea***

| <i>W</i> | <i>X</i> | <i>Y</i> | <i>Z</i> | <i>f4</i> | <i>Z-score*</i> |
|----------|----------|----------|----------|-----------|-----------------|
| East     | West     | NPC      | Ber.     | 0.15      | 22.80           |
| East     | YTAK     | West     | Ber.     | 0.22      | 23.04           |
| East     | West     | SYT      | Ber.     | 0.21      | 32.03           |
| Ber.     | East     | SYT      | West     | 0.38      | 32.56           |
| East     | West     | YTAK     | Ber.     | 0.24      | 42.36           |
| Ber.     | East     | NPC      | West     | 0.50      | 61.83           |
| East     | SYT      | West     | Ber.     | 0.55      | 64.65           |
| East     | NPC      | West     | Ber.     | 0.61      | 87.78           |

274 \* All *Z*-scores are significant (> 5).

275  
276  
277  
278  
279  
280  
281  
282  
283  
284  
285  
286  
287  
288  
289  
290  
291  
292  
293  
294  
295  
296  
297  
298  
299  
300  
301  
302  
303  
304  
305  
306  
307  
308

Supplementary Table 6. *f4*-statistic tests with *M. americana* outgroup (OG)

| W  | X        | Y        | Z        | <i>f4</i> | Z-scores* |
|----|----------|----------|----------|-----------|-----------|
| OG | Beringia | East     | NPC      | 0.5381    | 88.851    |
| OG | Beringia | East     | SYT      | 0.4736    | 62.909    |
| OG | Beringia | East     | YTAK     | 0.1951    | 23.007    |
| OG | Beringia | West     | East     | 0.2773    | 85.269    |
| OG | Beringia | West     | NPC      | 0.6372    | 100       |
| OG | Beringia | West     | SYT      | 0.5957    | 100       |
| OG | Beringia | West     | YTAK     | 0.3875    | 62.77     |
| OG | Beringia | SYT      | NPC      | 0.1299    | 9.769     |
| OG | Beringia | YTAK     | NPC      | 0.4147    | 48.393    |
| OG | Beringia | YTAK     | SYT      | 0.3147    | 27.843    |
| OG | East     | Beringia | NPC      | 0.2832    | 41.676    |
| OG | East     | Beringia | West     | 0.0861    | 19.748    |
| OG | East     | Beringia | SYT      | 0.3681    | 54.142    |
| OG | East     | Beringia | YTAK     | 0.4473    | 83.495    |
| OG | East     | NPC      | SYT      | 0.1009    | 9.026     |
| OG | East     | NPC      | YTAK     | 0.2907    | 41.461    |
| OG | East     | West     | NPC      | 0.0553    | 10.812    |
| OG | East     | West     | SYT      | 0.1578    | 22.393    |
| OG | East     | West     | YTAK     | 0.3314    | 56.935    |
| OG | East     | SYT      | YTAK     | 0.2031    | 23.241    |
| OG | NPC      | East     | Beringia | 0.3008    | 31.794    |
| OG | NPC      | East     | SYT      | 0.2128    | 26.195    |
| OG | NPC      | East     | YTAK     | 0.0957    | 14.846    |
| OG | NPC      | West     | Beringia | 0.5085    | 70.422    |
| OG | NPC      | West     | East     | 0.3166    | 76.992    |
| OG | NPC      | West     | SYT      | 0.441     | 70.758    |
| OG | NPC      | West     | YTAK     | 0.3578    | 69.802    |
| OG | NPC      | SYT      | Beringia | 0.1835    | 22.851    |
| OG | NPC      | YTAK     | Beringia | 0.2598    | 28.847    |
| OG | NPC      | YTAK     | SYT      | 0.1321    | 16.507    |
| OG | West     | Beringia | East     | 0.3548    | 100       |
| OG | West     | Beringia | NPC      | 0.1904    | 35.861    |
| OG | West     | Beringia | SYT      | 0.2455    | 50.398    |
| OG | West     | Beringia | YTAK     | 0.3128    | 84.295    |
| OG | West     | NPC      | East     | 0.2659    | 58.322    |
| OG | West     | NPC      | SYT      | 0.0614    | 7.772     |
| OG | West     | NPC      | YTAK     | 0.1979    | 36.19     |
| OG | West     | SYT      | East     | 0.2288    | 48.123    |



|    |      |          |          |        |        |
|----|------|----------|----------|--------|--------|
| OG | West | SYT      | YTAK     | 0.1499 | 24.874 |
| OG | West | YTAK     | East     | 0.0848 | 18.987 |
| OG | SYT  | East     | Beringia | 0.1278 | 9.286  |
| OG | SYT  | East     | NPC      | 0.1143 | 9.849  |
| OG | SYT  | East     | YTAK     | 0.0399 | 6.165  |
| OG | SYT  | NPC      | Beringia | 0.0549 | 5.66   |
| OG | SYT  | West     | Beringia | 0.4103 | 42.167 |
| OG | SYT  | West     | East     | 0.3731 | 86.48  |
| OG | SYT  | West     | NPC      | 0.3902 | 50.232 |
| OG | SYT  | West     | YTAK     | 0.3692 | 79.363 |
| OG | SYT  | YTAK     | Beringia | 0.1069 | 8.162  |
| OG | SYT  | YTAK     | NPC      | 0.0816 | 8.047  |
| OG | YTAK | Beringia | East     | 0.2764 | 27.122 |
| OG | YTAK | Beringia | NPC      | 0.1736 | 21.245 |
| OG | YTAK | Beringia | SYT      | 0.215  | 23.691 |
| OG | YTAK | NPC      | East     | 0.2006 | 22.649 |
| OG | YTAK | NPC      | SYT      | 0.051  | 5.704  |
| OG | YTAK | West     | Beringia | 0.0849 | 10.175 |
| OG | YTAK | West     | East     | 0.4048 | 90.67  |
| OG | YTAK | West     | NPC      | 0.1721 | 26.594 |
| OG | YTAK | West     | SYT      | 0.2321 | 34.026 |
| OG | YTAK | SYT      | East     | 0.1645 | 19.083 |

310  
311  
312  
313  
314  
315  
316  
317  
318  
319  
320  
321  
322  
323  
324  
325  
326  
327  
328  
329  
330

<sup>a</sup> All comparisons with only a single hybrid (NPC, SYT, or YTAK) included in the test and *M. americana* as an outgroup (OG).

\*Z-scores are positive for ease of interpretation and all are significant (> 5). Rotating the order of a pair (e.g., YZ to ZY) switches the sign +/- of both the  $f_4$ -statistic and the Z-score but does not change the interpretable relationships.

331 **Supplementary Table 7. AdmixtureGraph minimal error estimates**  
 332 **(A)**

| Nodal Codes <sup>a</sup> | Minimal Error          |                  |
|--------------------------|------------------------|------------------|
|                          | <i>5-taxa backbone</i> |                  |
|                          | SYT                    | YTAK             |
| B-N                      | <b>145116.00</b>       | 147595.50        |
| B-E                      | 148680.80              | 142512.30        |
| B-W                      | 149402.10              | 150093.00        |
| N-E                      | 145149.90              | <b>139919.00</b> |
| N-W                      | 146026.20              | 147804.70        |
| E-W                      | 151694.10              | 150582.00        |
| NB-E                     | 148680.80              | 142512.30        |
| NB-W                     | 149402.10              | 150093.00        |
| WE-B                     | 149402.10              | 150093.00        |
| WE-N                     | 146026.20              | 147804.70        |
| NB-EW                    | 149402.10              | 150093.00        |
| WEB-NB                   | 149402.10              | 150092.90        |
| WEB-WE                   | 152147.80              | 155840.20        |
| WEB-B                    | 149402.10              | 150092.90        |
| WEB-N                    | 146026.20              | 147692.00        |
| WEB-E                    | 151694.10              | 150575.70        |
| WEB-W                    | 152147.80              | 156049.50        |
| EW-E                     | 151694.10              | 149943.30        |
| W-WE                     | 152147.80              | 155840.20        |
| N-NB                     | 146026.20              | 147804.70        |
| BN-B                     | 149402.00              | 150093.00        |
| B-EB                     | na                     | na               |
| EB-E                     | na                     | na               |

333  
 334 **(B)**

| Nodal Codes <sup>a</sup> | Minimal Error                         |                 |          |                              |                 |                 |
|--------------------------|---------------------------------------|-----------------|----------|------------------------------|-----------------|-----------------|
|                          | <i>AdmixtureGraph 4-taxa backbone</i> |                 |          | <i>RaxML 4-taxa backbone</i> |                 |                 |
|                          | SYT                                   | YTAK            | NPC      | SYT                          | YTAK            | NPC             |
| B-E                      | 55132.96                              | 47383.25        | 70165.58 | <b>72727.22</b>              | 61506.26        | <b>82798.40</b> |
| B-W                      | <b>52304.13</b>                       | 47105.77        | 62996.35 | 73410.49                     | 69668.84        | 83144.70        |
| E-W                      | 52309.13                              | 46983.80        | 62816.24 | 74264.60                     | 69046.22        | 82977.55        |
| WE-B                     | na                                    | na              | na       | 73410.49                     | 69.668.80       | 83144.46        |
| WEB-B                    | 52362.71                              | 39848.05        | 63877.58 | 73792.47                     | 67922.87        | 84830.71        |
| WEB-E                    | 52371.27                              | <b>39505.20</b> | 63762.10 | 73685.00                     | <b>61351.88</b> | 82865.19        |
| WEB-W                    | 58496.32                              | 62257.46        | 67371.90 | 74368.69                     | 70895.87        | 83219.90        |
| EW-E                     | na                                    | na              | na       | 73685.00                     | 64299.36        | 82865.19        |

|      |          |          |                 |          |          |          |
|------|----------|----------|-----------------|----------|----------|----------|
| W-WE | na       | na       | na              | 74368.69 | 71436.82 | 83215.46 |
| B-EB | 52632.71 | 47061.96 | 63877.58        | na       | na       | na       |
| EB-E | 52371.27 | 46983.80 | <b>62762.10</b> | na       | na       | na       |
| EB-W | 52309.13 | 47061.96 | 62996.35        | na       | na       | na       |

335

336 <sup>a</sup> Hybrids can be descended from sister clades (connected by '-') or a group of related clades  
337 (each separated by '/'), represented by the clades' first letter (B = Beringia, N = NPC, E = East,  
338 W = West).

339 <sup>b</sup> ***bold italics***, indicates the most likely ancestral relationships for each hybrid sample

340 <sup>c</sup> Not all relationships are present in both topologies (Supplementary Fig. 5), these relationships  
341 are denoted with 'na'.

342

343

344

345

346

347

348

349

350

351

352

353

354

355

356

357

358

359

360

361

362

363

364

365

366

367

368

369

370

371

372

373

374

375

376 **Supplementary Table 8. Range of hierarchical admixture date estimates**

| <b>Admixed</b> | <b>Source 1</b> | <b>Source 2</b> | <b>reps</b> | <b>alpha</b> | <b>Mixed Drift</b> | <b>Years (Ne 300k)</b> | <b>Years (Ne 375k)</b> | <b>Years (Ne 450k)</b> |
|----------------|-----------------|-----------------|-------------|--------------|--------------------|------------------------|------------------------|------------------------|
| SYT            | Beringian       | East            | 852         | 0.48-0.59    | 0.00-0.00          | 0                      | 0                      | 0                      |
| YTAK           | East            | Beringia        | 852         | 0.52-0.78    | 0.00-0.00          | 0                      | 0                      | 0                      |
| NPC            | Beringia        | East            | 865         | 0.48-0.73    | 0.00-0.23          | 0-315,197.2            | 0-393,996.5            | 0-472,795.8            |

377  
 378  
 379  
 380  
 381  
 382  
 383  
 384  
 385  
 386  
 387  
 388  
 389  
 390  
 391  
 392  
 393  
 394  
 395  
 396  
 397  
 398  
 399  
 400  
 401  
 402  
 403  
 404  
 405  
 406  
 407  
 408  
 409  
 410  
 411  
 412  
 413  
 414  
 415  
 416

417 **Supplementary Table 9. Voucher specimen museum identification numbers and metadata**  
 418

| <b>MSB#<sup>a</sup></b> | <b>Locality</b>       | <b>Abrv.<sup>b</sup></b> | <b>Clade<sup>c</sup></b> | <b>HiSeq lanes</b> | <b>Pairs Sequenced</b> | <b>Bases (Gb)</b> | <b>Coverage</b> |
|-------------------------|-----------------------|--------------------------|--------------------------|--------------------|------------------------|-------------------|-----------------|
| 152905                  | British Columbia      | BC                       | East                     | 4                  | 996,730,113            | 199.35            | 61.16           |
| 221783                  | Prince of Wales, AK   | POW                      | NPC                      | 4                  | 122,281,422            | 24.70             | 8.40            |
| 199855                  | Revillagigedo Is., AK | REV                      | East                     | 4                  | 413,868,733            | 83.60             | 27.03           |
| 43333                   | Vermont               | VT                       | East                     | 1                  | 261,862,572            | 52.37             | 17.10           |
| 145234                  | Yukon Territory       | SYT                      | X                        | 1                  | 216,684,577            | 43.77             | 15.42           |
| 148962                  | Annette Is., AK       | ANN                      | East                     | 1                  | 242,559,925            | 49.00             | 15.70           |
| 149365                  | Kupreanof Is., AK     | KUP                      | East                     | 1                  | 225,414,511            | 45.53             | 12.67           |
| 144524                  | New Mexico            | NM                       | West                     | 1                  | 225,740,082            | 45.60             | 14.58           |
| 215111                  | Yukon-Alaska border   | YTAK                     | X                        | 1                  | 158,943,442            | 32.11             | 10.29           |
| 248153                  | Mongolia              | MON                      | Ber.                     | 1                  | 220,469,640            | 44.53             | 14.10           |

419 <sup>a</sup> Museum accession numbers associated with voucher specimens held at the Museum of  
 420 Southwestern Biology (MSB).

421 <sup>b</sup> Abrv = abbreviation

422 <sup>c</sup> NPC = North Pacific Coast Island clade; X = Alaska-Canada hybrid population; Ber. = Beringia  
 423 Clade

424  
 425  
 426  
 427  
 428  
 429  
 430  
 431  
 432  
 433  
 434  
 435  
 436  
 437  
 438  
 439  
 440  
 441  
 442  
 443  
 444  
 445  
 446  
 447  
 448  
 449

450

**Supplementary Table 10. SNP filtering and quantity per analysis**

| <b>Analysis</b>                                 | <b>#SNPs</b> | <b>Filtering</b>                                                                                                                      | <b>Outgroup</b>    |
|-------------------------------------------------|--------------|---------------------------------------------------------------------------------------------------------------------------------------|--------------------|
| <b>TreeMix (<i>Martes</i>)</b>                  | 332,621      | Missing data removed, pseudo-chromosomes, spaced                                                                                      | <i>Martes</i>      |
| <b>TreeMix (<i>M. putorius</i>)</b>             | 3,419,651    | Missing data removed, pseudo-chromosomes, spaced                                                                                      | <i>M. putorius</i> |
| <b>ADMIXTURE</b>                                | 14,386,411   | 2nd round of filtering + Sites with >80% missing data removed                                                                         | None               |
| <b>PCA</b>                                      | 15,673,343   | 1st and 2nd rounds of filtering, pseudo-chromosomes                                                                                   | None               |
| <b>F-statistics, MixMapper</b>                  | 20,706,783   | Spaced, pseudo-chromosomes                                                                                                            | <i>M. putorius</i> |
| <b>Relatedness2</b>                             | 41,300,628   | 1st round of filtering + MAF (0.99), pseudo-chromosomes, spaced                                                                       | <i>Martes</i>      |
| <b><math>F_{ST}</math> and <math>\pi</math></b> | 58,719,680   | 1st round of filtering + MAF (0.99)                                                                                                   | <i>Martes</i>      |
| <b>2nd round of Filtering, RaxML</b>            | 59,074,574   | 1st round of filtering + MAF (0.01)                                                                                                   | <i>Martes</i>      |
| <b>1st round of Filtering</b>                   | 165,789,498  | Indels removed, minimum depth (2), minimum genotype quality (30), minimal mean depth (10), maximum MAF (0.99), <i>Martes</i> outgroup | <i>Martes</i>      |

451

452

453

454

455

456

457

458

459

460

461

462

463

464

465

466

467

468

469

470

471

472

473

474

475

476

477 **Supplementary Table 11. Nucleotide diversity ( $\pi$ ) based on 100bp sliding window averages**

| <b>Lineage</b> | <b>Avg. # Variants</b> | <b><math>\pi</math></b> |
|----------------|------------------------|-------------------------|
| Beringia       | 556.65                 | 0.0012                  |
| East           | 78.99                  | 0.0019                  |
| NPC            | 100.02                 | 0.0010                  |
| West           | 106.40                 | 0.0008                  |

478  
 479  
 480  
 481  
 482  
 483  
 484  
 485  
 486  
 487  
 488  
 489  
 490  
 491  
 492  
 493  
 494  
 495  
 496  
 497  
 498  
 499  
 500  
 501  
 502  
 503  
 504  
 505  
 506  
 507  
 508  
 509  
 510  
 511  
 512  
 513  
 514  
 515  
 516

517  
518  
519

**Supplementary Table 12. AdmixtureGraph minimal error backbone topology identification**

| <b>Topology</b>                     | <b>Minimal Error</b> |
|-------------------------------------|----------------------|
| <i>4-taxa backbone Optimization</i> |                      |
| (OG,(W,(E,B)))                      | <b>22,471.35</b>     |
| (OG,(E,(W,B)))                      | 35,321.57            |
| (OG,(B,(E,W)))                      | 26,845.98            |
| <i>5-taxa backbone Optimization</i> |                      |
| (OG,(W,E),(N,B))                    | <b>83,218.04</b>     |
| (OG,(W,E),(N,B))                    | 99,425.96            |
| (OG,(W,E),(N,B))                    | 106,980.00           |

520  
521

**Supplementary References**

- 523 1. King, C. M. *Mustela erminea*. *Mammalian Species* No. 195, 1–8 (1983).
- 524 2. Manichaikul, A., Mychaleckyj, J.C., Rich, S.S., Daly, K., Sale, M., Chen, W.-M. Robust  
525 relationship inference in genome-wide association studies. *Bioinformatics* **26**, 2867–2873 (2010).
- 526 3. Dyke, A. S., Moore, A. & Robertson, L. Deglaciation of North America. *Natural Resources*  
527 *Canada, Ottawa* Open File 1574 (2003).

528
